# Supplementary material
Source: MDPI journal article supplement (https://www.mdpi.com/2227-9717/10/8/1542)
Supplement: s1 [file s1]

## Supplementary Documents

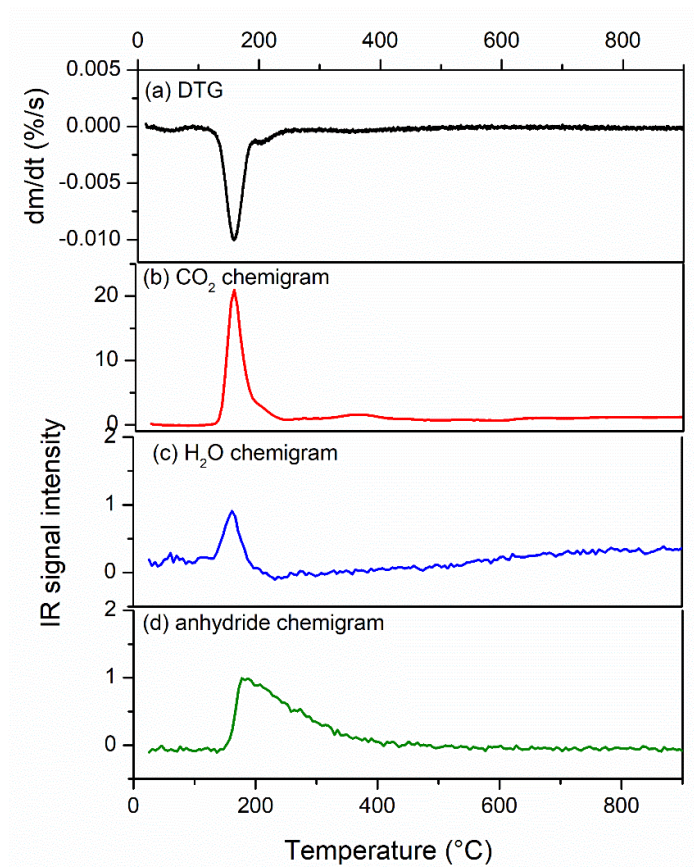

**Figure S1.** TGA-FTIR results of the A-C sample (i.e.  $\text{Al}_2\text{O}_3$ +citric acid) at a heating rate of 5 °C/min under a  $\text{N}_2$  flow: (a) DTG curve, (b)  $\text{CO}_2$  evolution profile, (c)  $\text{H}_2\text{O}$  evolution profile, (d) anhydride evolution profile

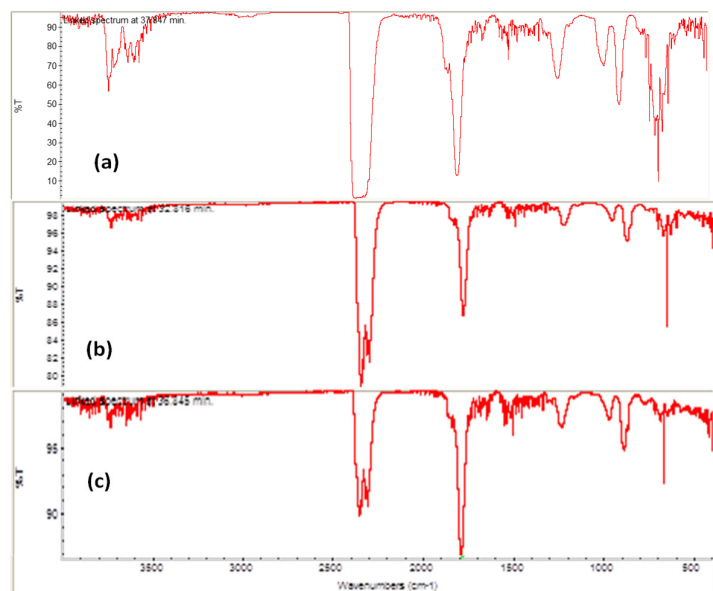

**Figure S2.** IR transmittance spectra of volatile products in the TGA-FTIR experiments (a heat ramp of 5 °C/min under N<sub>2</sub> flow): (a) pure citric acid at 213°C, (b) Al<sub>2</sub>O<sub>3</sub> +citric acid at 188°C, (c) NiO/Al<sub>2</sub>O<sub>3</sub> +citric acid at 208°C.

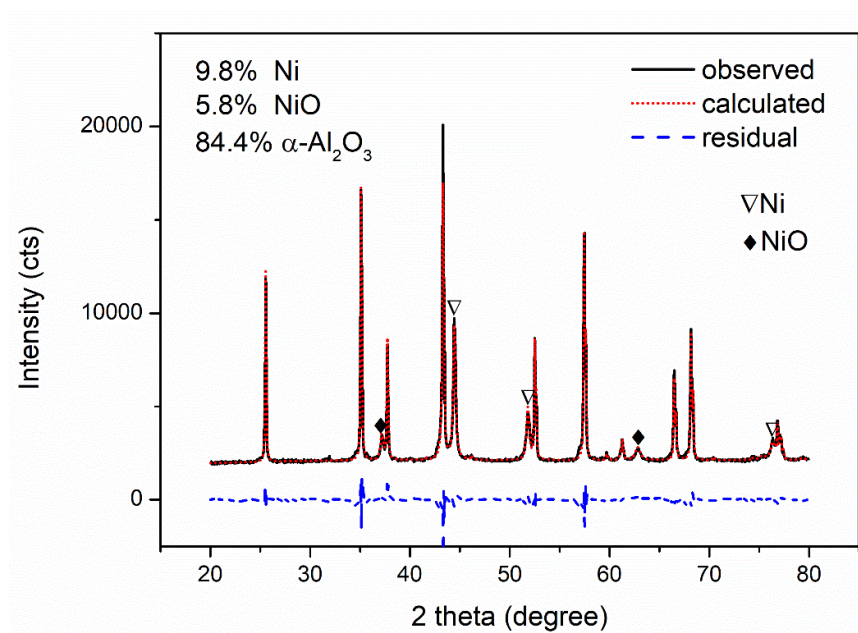

**Figure S3.** XRD profile of the NA-C-740 sample and its Rietveld refinement result: 84.4%  $\alpha$ -Al<sub>2</sub>O<sub>3</sub>, 9.8% Ni and 5.8% NiO, weighted R profile is 4.10 and goodness of fitting is 4.34. (ICDD reference code for  $\alpha$ -Al<sub>2</sub>O<sub>3</sub>: 04-005-4505, for NiO: 04-013-0890, for Ni: 04-010-6148)

**Table S1.** Wavenumber ranges set for collecting chemigrams of volatile products in the TGA-FTIR experiments

| component            | Region( $\text{cm}^{-1}$ ) | Baseline( $\text{cm}^{-1}$ ) |
|----------------------|----------------------------|------------------------------|
| $\text{CO}_2$        | 2250-2400                  | 2250-2400                    |
| CO                   | 2000-2200                  | 2000-2200                    |
| $\text{H}_2\text{O}$ | 1300-1600                  | 1300-1600                    |
| anhydride            | 800-1100                   | 800-1100                     |

**Table S2.** IR bands in the above FTIR spectra and their assignment

| IR band wavenumber ( $\text{cm}^{-1}$ ) | assignment                                             |
|-----------------------------------------|--------------------------------------------------------|
| 4000-3400                               | $\text{H}_2\text{O}$                                   |
| 2250-2400                               | $\text{CO}_2$                                          |
| 1700-1900                               | C=O stretching vibration of anhydrides                 |
| 1600-1300                               | $\text{H}_2\text{O}$                                   |
| 1250                                    | C-O stretching vibration of anhydrides                 |
| 900, 970                                | =CH & =CH <sub>2</sub> bending vibration of anhydrides |
| 600-750                                 | $\text{CO}_2$                                          |
